# Supplementary material for: Revealing the sources and sinks of negative cluster ions in an urban environment through quantitative analysis
Source: Copernicus journal article supplement (doi:10.5194/acp-23-5279-2023), 2023-05-11
Supplement: Supplementary file 1 [file acp-23-5279-2023-supplement.pdf]

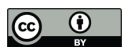

*Supplement of*

## **Revealing the sources and sinks of negative cluster ions in an urban environment through quantitative analysis**

**Rujing Yin et al.**

*Correspondence to:* Jingkun Jiang ([jiangjk@tsinghua.edu.cn](mailto:jiangjk@tsinghua.edu.cn))

The copyright of individual parts of the supplement might differ from the article licence.

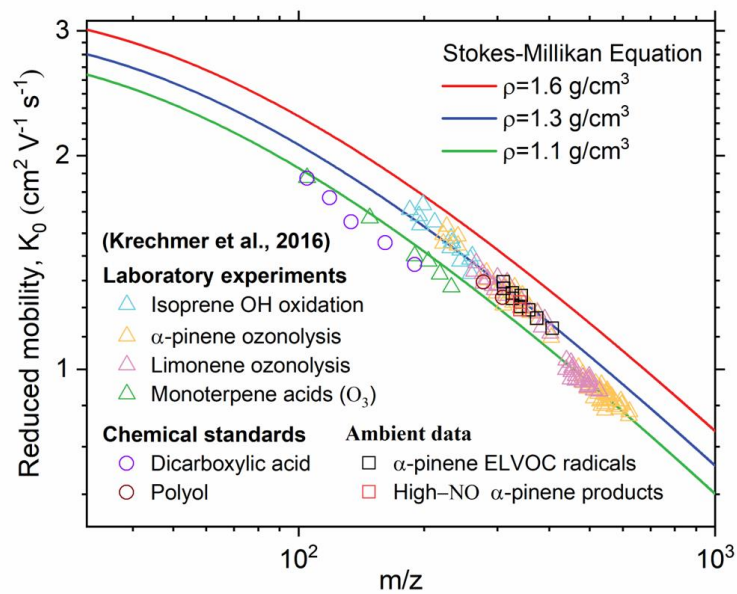

19

20 **Figure S1.** The measured reduced mobilities of different organic cluster ions in ion mobility spectrometer (Krechmer et al.,  
 21 2016) and simulated mobilities based on the Stokes-Millikan equation using different densities.

22

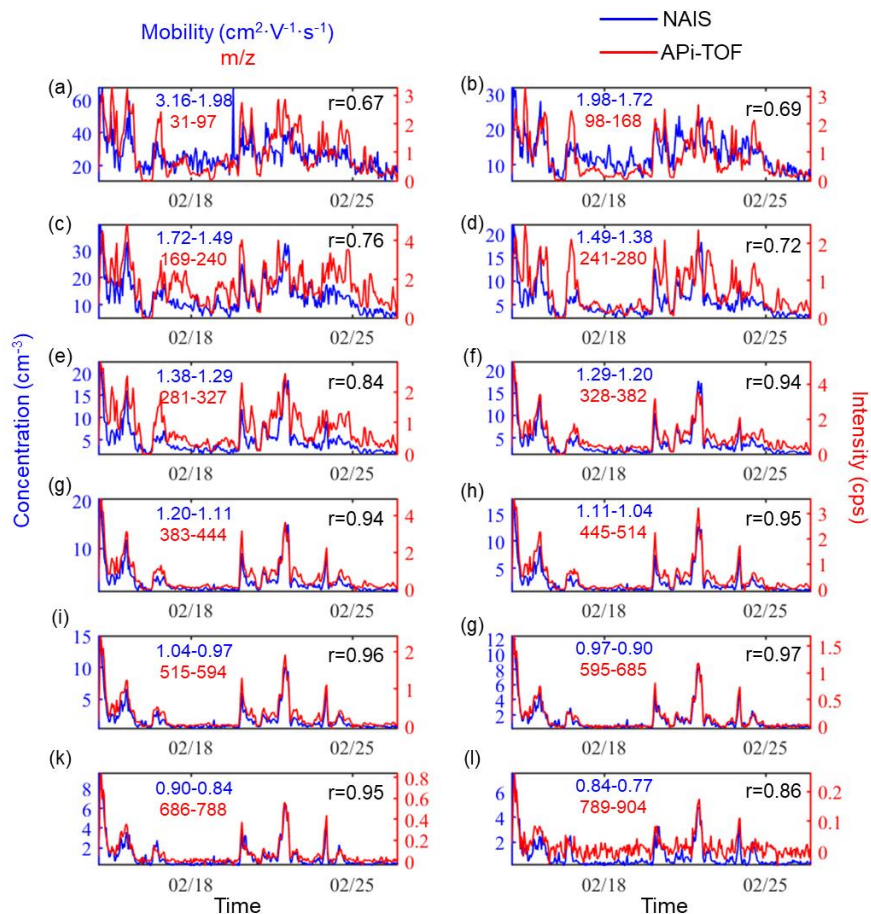

23

24 **Figure S2.** The concentrations of cluster ions with different mobility ranges measured by NAIS and the signal of cluster ions  
 25 with corresponding  $m/z$  ranges measured by APi-TOF. The mobility and  $m/z$  are converted according to the method described  
 26 in Section 2.2 in the main text.

27

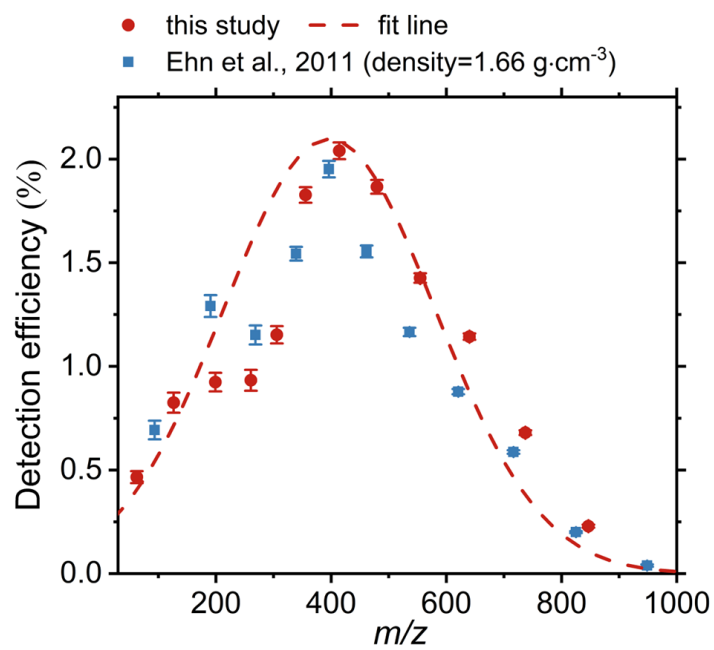

28

29 **Figure S3.** A comparison between the detection efficiency obtained using fixed density (Ehn et al., 2011) and the mass-  
30 dependent methods proposed in this study when converting  $m/z$  to mobility.  
31

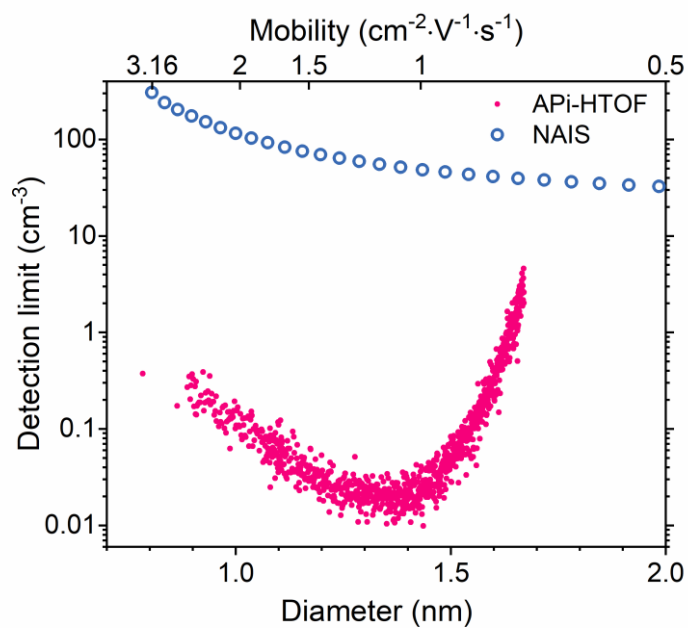

32

33 **Figure S4.** The detection limit of APi-HTOF and NAIS for negative cluster ions. The detection limit of APi-HTOF is  
 34 determined using data with a resolution of 1 hour, and the detection limit of NAIS is determined using data with a resolution  
 35 of 2 min. The detection limit of the APi-HTOF is determined according to the noise of microchannel plate (MCP) detector and  
 36 the detection efficiency. The detection limit of the NAIS is determined according to the noise of the electrometer and its transfer  
 37 function, and the noise of the electrometer was assumed to be 0.006 fA in this study.

38

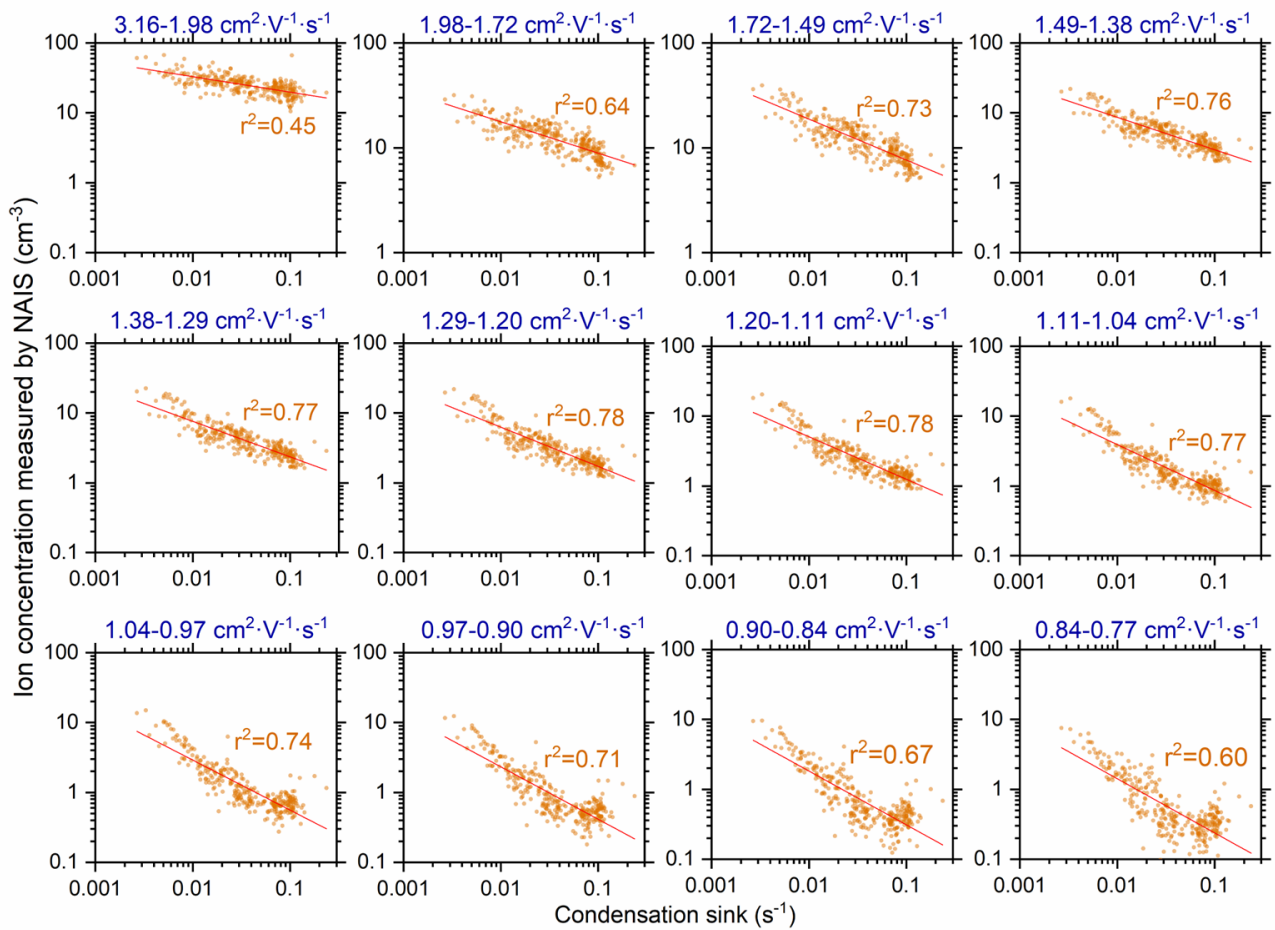

39

40 **Figure S5.** The scatter plots of CS and concentrations of cluster ions with different mobility ranges measured by NAIS in  
 41 urban Beijing, as well as the square of correlation coefficients.

42

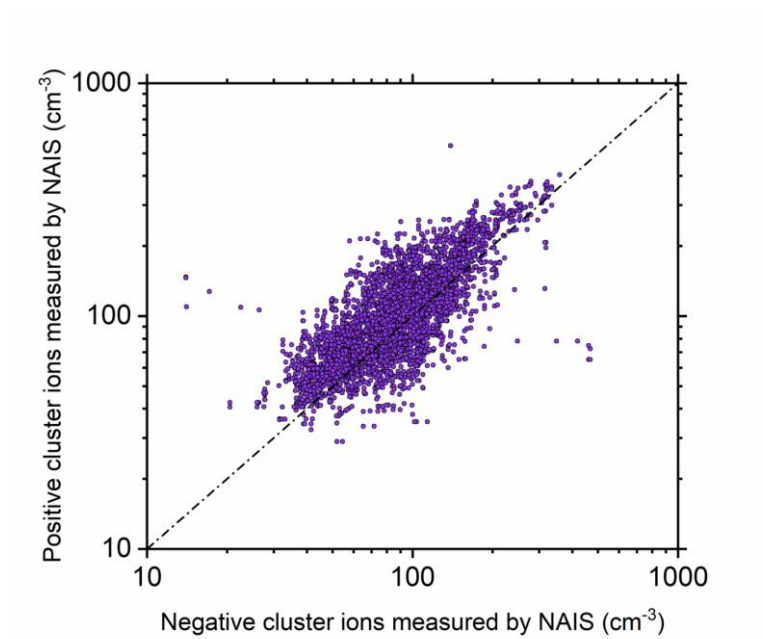

43

44 **Figure S6.** The scatter plots of the concentrations of negative and positive cluster ions measured by NAIS during the  
45 measurement in urban Beijing.

46

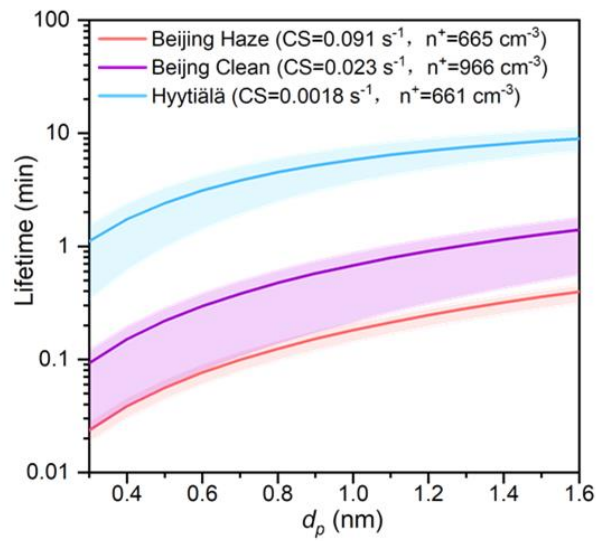

47

48 **Figure S7.** The lifetime (the time needed for the concentration of a given ion concentration to decay to 1/e of its initial  
 49 value due to the coagulation loss to particles and recombination with opposite ions, calculated as  $1/(CS \cdot dp^{-1.7} + an^+)$  of  
 50 the cluster ions under typical conditions (i.e., the median value of CS and median of the total concentration of positive  
 51 ions in the range of 0.8-42 nm,  $n^+$ ) during haze and clean periods in Beijing and Hyytiälä. The shadow regions represent  
 52 25-75% of the CS ranges, that is 0.074-0.11 s<sup>-1</sup>, 0.013-0.034 s<sup>-1</sup>, and 0.001-0.0023 s<sup>-1</sup> during Beijing haze periods, Beijing  
 53 clean periods, and Hyytiälä.

54



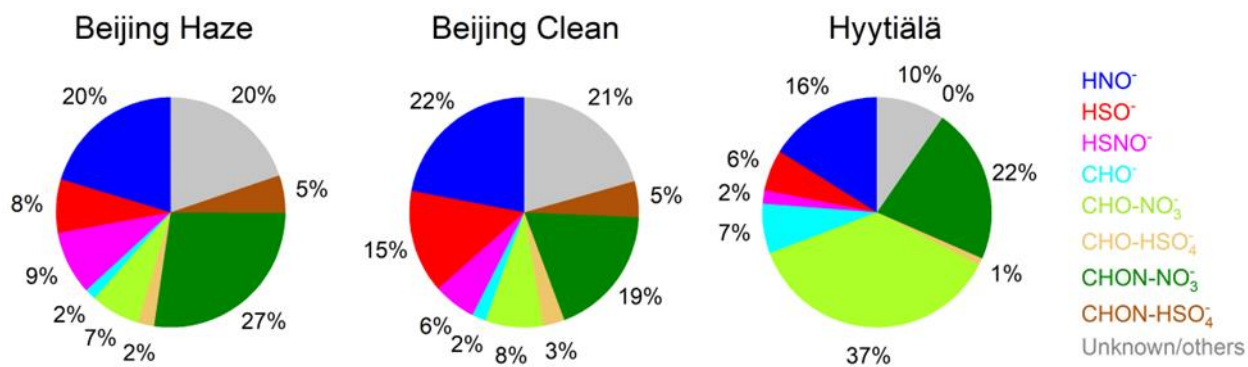

55  
 56 **Figure S8.** The species distributions of negative cluster ions during haze and clean periods in Beijing and  
 57 Hyytiälä. Haze periods were identified based on whether  $\text{PM}_{2.5}$  concentration is higher than  $75 \mu\text{g}\cdot\text{m}^{-3}$ .  
 58

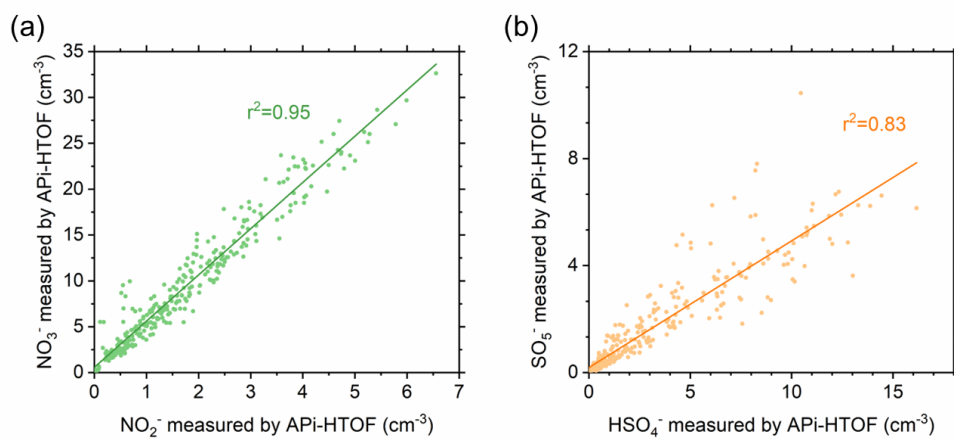

59

60 **Figure S9.** The scatter plot of the concentrations of specific ions measured by API-TOF in urban Beijing. (a)  $\text{NO}_2^-$  and  $\text{NO}_3^-$ ;  
61 (b)  $\text{HSO}_4^-$  and  $\text{SO}_5^-$ .

62

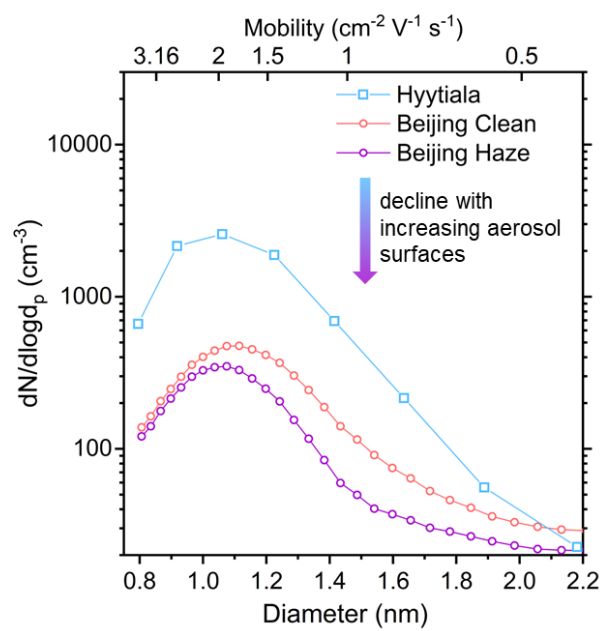

63

64 **Figure S10.** The ion mobility distributions and size distributions measured by NAIS during haze and clean periods in  
 65 Beijing and Hyytiälä.

66

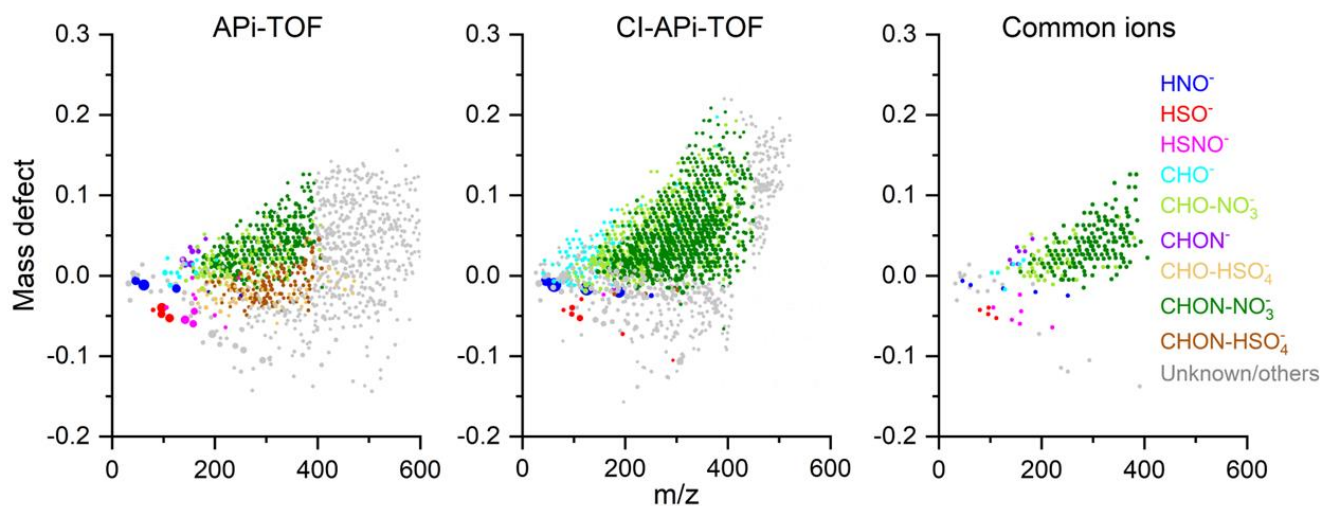

67

68 **Figure S11.** The mass defect plots of the species detected in ions (APi-HTOF), neutral gases (CI-API-LTOF), and  
 69 their common species in urban Beijing

70

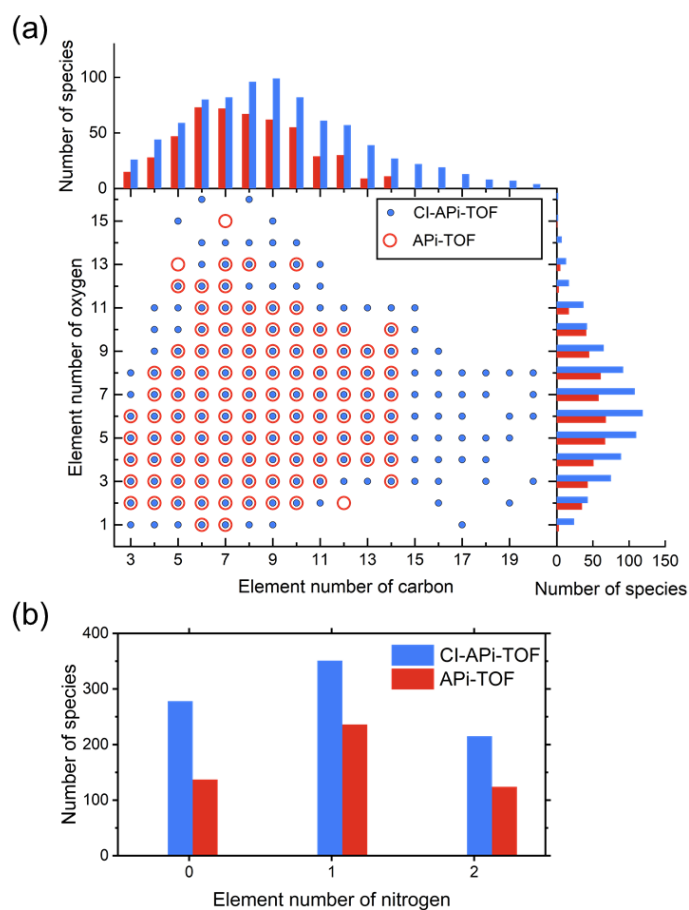

71

72 **Figure S12.** Comparison of the organic molecules detected in APi-TOF and CI-API-TOF respectively. (a) The distribution of  
 73 species with different number of carbon atoms and oxygen atoms. (b) The distribution of species with different number of  
 74 nitrogen atoms.

75

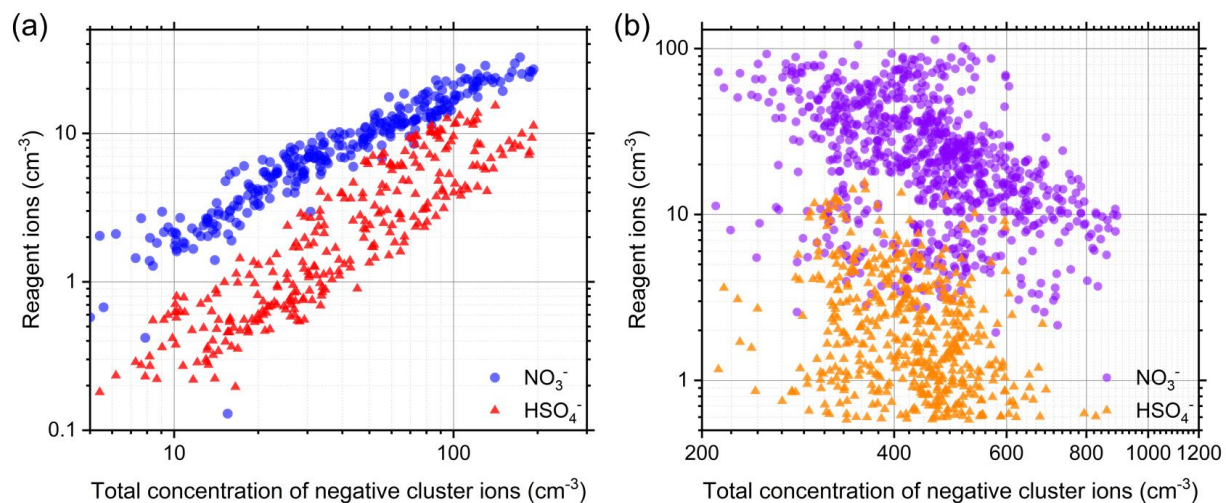

76

77 **Figure S13.** The variation of  $\text{NO}_3^-$  and  $\text{HSO}_4^-$  with the total negative cluster ions measured by APi-TOF in (a) urban Beijing  
 78 and (b) Hyytiälä.

79

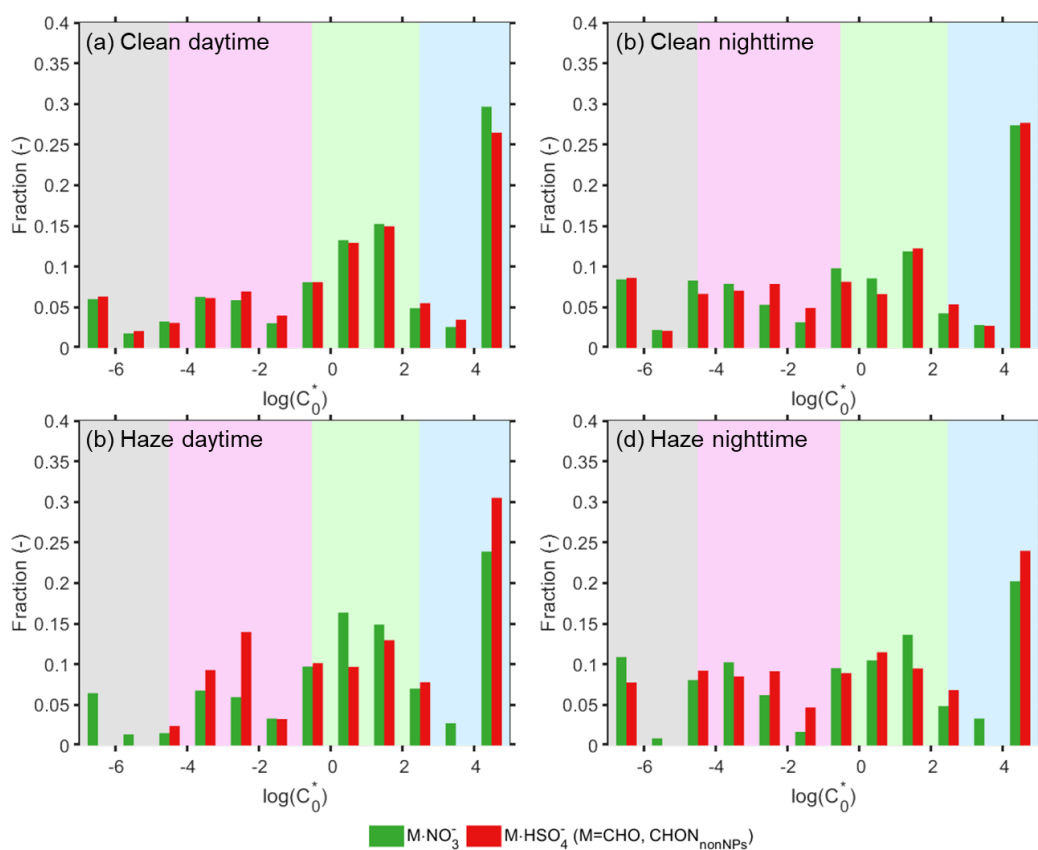

81

82 **Figure S14.** The volatility distribution of CHO and CHON<sub>nonNPs</sub> species that in the forms of adducts with both  
 83 NO<sub>3</sub><sup>-</sup> and HSO<sub>4</sub><sup>-</sup> during different periods and times. (a) Daytime of clean period. (b) Nighttime of clean period.  
 84 (c) Daytime of haze period. (d) Nighttime of haze period. Only species that attached to both NO<sub>3</sub><sup>-</sup> and HSO<sub>4</sub><sup>-</sup>  
 85 were considered for calculating the volatility distribution.

86

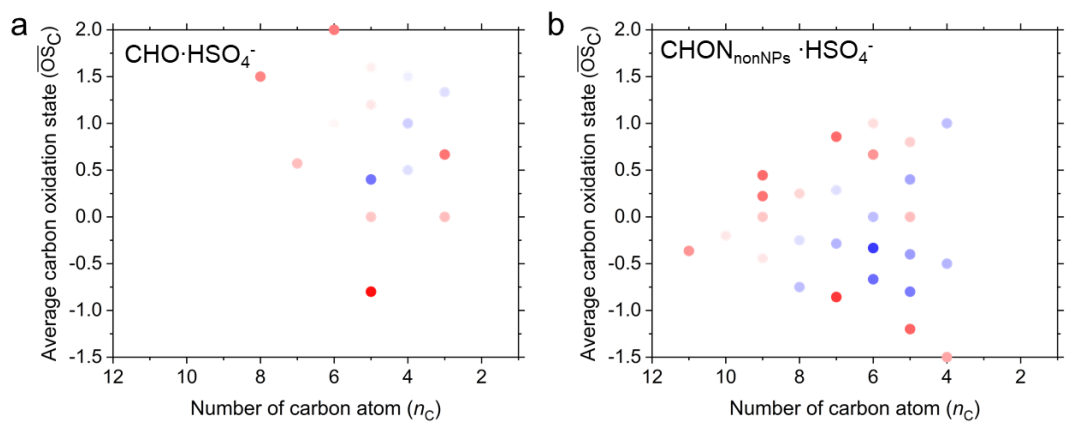

87

88 **Figure S15.** The carbon atom number and average carbon oxidation state ( $\overline{OS}_C$ ) of molecules in  $\text{CHO} \cdot \text{HSO}_4^-$  (a) and  
 89  $\text{CHON}_{\text{nonNPs}} \cdot \text{HSO}_4^-$  (b). The color represents their charge fraction during the measurement periods.

90

91



92 **Table S1.** The measurement period and time resolution for instruments at AHL/BUCT and SMEAR II stations.

| Site, type                 | Location          | Instrument  | Time resolution | Measurement period    |
|----------------------------|-------------------|-------------|-----------------|-----------------------|
| AHL/BUCT,<br>urban         | Beijing, China    | APi-HTOF    | 1 h             | Feb 14-Feb 27, 2018   |
|                            |                   | CI-APi-LTOF | 5 min           | Jan 23-April 14, 2018 |
|                            |                   | NAIS        | 4.5 min         | Jan 12-Dec 31, 2018   |
| SMEAR II,<br>boreal forest | Hyytiälä, Finland | APi-HTOF    | 1 h             | April 7-June 8, 2013  |
|                            |                   | NAIS        | 4.5 min         | Jan 1-Dec 31, 2013    |

93

94

**Table S2.** The reduced mobilities of  $\text{NO}_3^-$ ,  $\text{HSO}_4^-$ , and some of their clusters

| Formula                                                                             | m/z      | Reduced mobility, $K_0$<br>( $\text{cm}^{-2} \cdot \text{V}^{-1} \cdot \text{s}^{-1}$ ) |
|-------------------------------------------------------------------------------------|----------|-----------------------------------------------------------------------------------------|
| $\text{O}_2^-$                                                                      | 31.9904  | <sup>a</sup> 3.28                                                                       |
| $\text{NO}_2^-$                                                                     | 45.9935  | <sup>a</sup> 2.70                                                                       |
| $\text{NO}_3^-$                                                                     | 61.9884  | <sup>b</sup> 2.45                                                                       |
| $\text{HNO}_3 \cdot \text{NO}_3^-$                                                  | 124.9840 | <sup>c</sup> 2.07                                                                       |
| $\text{HSO}_4^-$                                                                    | 96.9601  | <sup>d</sup> 2.01                                                                       |
| $\text{H}_2\text{SO}_4 \cdot \text{HSO}_4^-$                                        | 194.9275 | <sup>d</sup> 1.63                                                                       |
| $(\text{H}_2\text{SO}_4)_2 \cdot \text{HSO}_4^-$                                    | 292.8949 | <sup>d</sup> 1.27                                                                       |
| $(\text{H}_2\text{SO}_4)_3 \cdot \text{HSO}_4^-$                                    | 390.8622 | <sup>d</sup> 1.17                                                                       |
| $(\text{H}_2\text{SO}_4)_2 \cdot \text{C}_2\text{H}_7\text{N} \cdot \text{HSO}_4^-$ | 337.9527 | <sup>d</sup> 1.21                                                                       |

95 <sup>a</sup>From Spangler et al. (Spangler and Collins, 1975); <sup>b</sup>From Stano et al. (Stano et al., 2008); <sup>c</sup>From Liang et al. (Liang  
96 et al., 2013); <sup>d</sup>From Jen et al. (Jen et al., 2015)

97

98 **Reference**

- 99 Ehn, M., Junninen, H., Schobesberger, S., Manninen, H. E., Franchin, A., Sipila, M., Petaja, T., Kerminen, V. M., Tammet, H.,  
100 Mirme, A., Mirme, S., Horrak, U., Kulmala, M., and Worsnop, D. R.: An Instrumental Comparison of Mobility and Mass  
101 Measurements of Atmospheric Small Ions, *Aerosol Sci. Technol.*, 45, 522-532, 10.1080/02786826.2010.547890, 2011.
- 102 Jen, C. N., Hanson, D. R., and McMurry, P. H.: Toward Reconciling Measurements of Atmospherically Relevant Clusters by  
103 Chemical Ionization Mass Spectrometry and Mobility Classification/Vapor Condensation, *Aerosol Sci. Technol.*, 49, i-iii,  
104 10.1080/02786826.2014.1002602, 2015.
- 105 Krechmer, J. E., Groessl, M., Zhang, X., Junninen, H., Massoli, P., Lambe, A. T., Kimmel, J. R., Cubison, M. J., Graf, S., Lin,  
106 Y.-H., Budisulistiorini, S. H., Zhang, H., Surratt, J. D., Knochenmuss, R., Jayne, J. T., Worsnop, D. R., Jimenez, J.-L., and  
107 Canagaratna, M. R.: Ion mobility spectrometry–mass spectrometry (IMS–MS) for on- and offline analysis of atmospheric gas  
108 and aerosol species, *Atmos. Meas. Tech.*, 9, 3245-3262, 10.5194/amt-9-3245-2016, 2016.
- 109 Liang, X., Zhou, Q., Wang, W., Wang, X., Chen, W., Chen, C., Li, Y., Hou, K., Li, J., and Li, H.: Sensitive detection of black  
110 powder by a stand-alone ion mobility spectrometer with an embedded titration region, *Anal. Chem.*, 85, 4849-4852,  
111 10.1021/ac400337s, 2013.
- 112 Spangler, G. E. and Collins, C. I.: Reactant ions in negative ion plasma chromatography, *Anal. Chem.*, 47, 393-402,  
113 10.1021/ac60353a019, 1975.
- 114 Stano, M., Safonov, E., Kucera, M., and Matejcik, S.: Ion Mobility Spectrometry Study of Negative Corona Discharge in  
115 Oxygen/Nitrogen Mixtures, *Chem. Listy*, 102, S1414-S1417, 2008.

116
